# Supplementary material for: Ethanolaminephosphate cytidylyltransferase is essential for survival, lipid homeostasis and stress tolerance in Leishmania major
Source: PubMed Central journal article supplement (PMC10411802; doi:10.1371/journal.ppat.1011112), 2023-07-28
Supplement: ppat.1011112.s001.pdf [file ppat.1011112.s001.pdf]

|    |                                                               |     |
|----|---------------------------------------------------------------|-----|
| Sc | -----                                                         | 0   |
| Pf | MSNQFLVDITYNBGYMRKFLSLRSVKKNDKQYIMKLCENTNIEEDELKRVFINELHN     | 60  |
| Lm | -----M-----                                                   | 1   |
| At | -----MVWEK-----                                               | 5   |
| Hs | -----                                                         | 0   |
| Sc | -----                                                         | 0   |
| Pf | ISNTSSTRKKNDSSCNESTNNTGNNKENGSSNTHFEDMKDINSSISNNSEEINEFEIDS   | 120 |
| Lm | -----PTVSSSTPSP-----ASTPTVGVPPGKVV-----LNADPNPND-----EYSLFCT  | 40  |
| At | -----EKIVGSCIVG-----GAFAVAVGASFLHLF-----LKGELPLG-----LGLGLSC  | 44  |
| Hs | -----MIRNG-----RGAAGGA                                        | 12  |
| Sc | ---MTVNLDPDKVWIDGCFDFTHGHAGAILQARRTVSKENGLFCGVHTDEDIQHNKG-    | 56  |
| Pf | STSTQEKTKETRIYVDGIFDLSSHGHFNAMRQAKL---GDIVVVGINSDEDALNSKGV    | 176 |
| Lm | EAIPPKVPVGTVRVWVWVDFDMLHFGHANALRRARRL---GDELFCVGHSDDEEVMRFKG- | 95  |
| At | PWRILRKRKFPVRVYMDGCFDMMHYGHGNALRQARAL---GDQLVV---VSDEEIIANKG- | 97  |
| Hs | BQPGPGGRRAVRVWCDGCVDMVHYGHSNQLRQARAM---GDYLVGVHTDEEIAKRG-     | 67  |
|    | ::: ** :*: * ** . : :*: . . . :*** **                         |     |
| Sc | TPVMNSSERYEHTSRNRWCSEVVEAAPVYVDPN---WMDKYQCQVYVHGDDITIDANGE   | 112 |
| Pf | KPIYTTQERGALIAQCKWVDEVIIGTKYVVDMD---LLEKYNCDYAAHGTDLAYDKNGT   | 232 |
| Lm | PPIMHAERIEALRACKWVDEHVENYPYCTRLK---DIERFEIDYVYVHGDDISVDLNGR   | 151 |
| At | PPVTFLEHERMTMKAVKVVDEVISDAPYAITEDFMKCLFDEYQIDYIIHGDDPCVLPDGT  | 157 |
| Hs | PPVTFQERYKMQAIIKWVDEVPVPAAPVYVTTLE---TLDKYNCDFCVHGNDITLTVDGR  | 123 |
|    | ** : ** . : * * . : * * . : * * . : * * . : * * . : * * . : * |     |
| Sc | DCYKLVKEMGRFKVVKRTYGVSTFEIIRILTKKSLPPTHPDYPTTQE-----          | 161 |
| Pf | CCYEVRKFKNKLKIFERSYGISTTTIINHLQAVNNSN---YSSSNNNNNNNNNNNNN     | 288 |
| Lm | NSYQEIIDAGKFKVVKRTKGISTDLVGRMLLCTKNHM---LKSVDVQ-----          | 197 |
| At | DAYALAKKAGRYKIKRTEGVSSTDIVGRMLLCVRRERS---ISDTHSRSS-----       | 203 |
| Hs | DTYEEVKQAGRYRECKRTQGVSTDLVGRMLLVTKAHH---SSQEMSS-----          | 168 |
|    | * . . : : :*: *:* * : : :*                                    |     |
| Sc | -----L-----                                                   | 162 |
| Pf | NFLVNSNNNNNDTNSVSTNEISDINNETNYVYNTNTNSEQLDNFNKNDNPNIIEITE     | 348 |
| Lm | -----L-E-----N-----                                           | 200 |
| At | -----SLQRQ-----F-----                                         | 209 |
| Hs | -----E-----Y-----                                             | 170 |
| Sc | -SFYS---VA-----QDAVSKHCYVFRDLNVLVWGG--YKFDA                   | 196 |
| Pf | BQIYNSELGISDDNKTKVSEQQHDIDTLPRKLLNRNRCHITTSQIYQFIDNNELIKKRN   | 408 |
| Lm | -SLL-----EHSPTMPLTTSRRIKIVQFSNNS--PKPG                        | 230 |
| At | -SHGSSPKFEDGASS-----AGTRVSHFLPTSRRIKIVQFSNGK--PGPD            | 251 |
| Hs | -REYADFSGKCPGGRN-----PWTGVSQFLQTSQKIIQFASGKE--PQPG            | 212 |
|    | : : .                                                         |     |
| Sc | EDCVYVGDGDFDLFHMGDIDQLRKLKMDLHPDKKLIVGITTS-----YSSTIMTKER     | 249 |
| Pf | KKVYVVDGSDIFHIGHLRILENAKK-LG--DYLLVGMHSDEVVQKMKGYFPVVSLLER    | 465 |
| Lm | DRIVYVVDGSDFLFHIGHIRVLQKARE-LG--DYVIAGVYEDQVNEHRKKNYPIMSFNER  | 287 |
| At | ARIYIDGAFDLFHAGHVEILRRARE-LG--DFLLVGIHNDQTVSAKRGAHRPIMNLHER   | 308 |
| Hs | ETVIYVAGAFDLFHIGHVDFLEKVER-LAERPVI IAGLHFDQEVNHYKGRNYPIMNLHER | 271 |
|    | :*: * **:* * . : * . . : * : :*: * . : : : : **               |     |
| Sc | VLSVLSCKYVDAVIIADATSMSQYCNCEKYHIGTAVLTAA-----                 | 289 |
| Pf | TLNVLAMKVVDDVIGAPWVITE-SFIRRFHIDVVVRGTVDYV-IYSNNEIDPYDIPKRL   | 523 |
| Lm | VLGVLSCRYVDEVMGVVDFVSK-DVIDGLHINVVVGDKFSDL-VVEEGGSTRYVFPKAM   | 345 |
| At | SLSVLACRYVDEVII GAPWVSR-DTITTFDISLVVHGTVAESDDFRKEEDNPYSVPISM  | 367 |
| Hs | FLSVLACRYVEVVI GAPYAVTA-ELLSHFVKVLDVCHGKTEIIPD--RDGSDPYQPKRR  | 328 |
|    | *.*** : * . * : : . . . . .                                   |     |
| Sc | GKF----SEYLTKELVKRVESQREVYIARNQKKGMSI-----                    | 323 |
| Pf | NIYQELSSSNTTYEIIQRIEKNNKY-LMRNMSKRNNKKEESIWETSNTYAINN-----    | 576 |
| Lm | GIYHEVDSGCILSTDSLIDRVVENRDLFLKROAEKRI-KDTSOEIKPDEYRK-LREAS-   | 402 |
| At | GIFQVLSPLDITFTSTIIRRIVANHEAYQKRNAKKEA-SEKYYEQKFSVSGD-----     | 419 |
| Hs | GIFRQIDSGSNLTTDLIVQRIITNRLEYEARNQKKEA-KELAFLEAARQAAQPLGERDG   | 387 |
|    | . : : : . : : * : : * : * . *                                 |     |
| Sc | -- 323                                                        |     |
| Pf | -- 576                                                        |     |
| Lm | -- 402                                                        |     |
| At | -- 419                                                        |     |
| Hs | DF 389                                                        |     |
