# Supplementary material for: Ethanolaminephosphate cytidylyltransferase is essential for survival, lipid homeostasis and stress tolerance in Leishmania major
Source: PubMed Central journal article supplement (PMC10411802; doi:10.1371/journal.ppat.1011112), 2023-07-28
Supplement: ppat.1011112.s002.pdf [file ppat.1011112.s002.pdf]

**A**

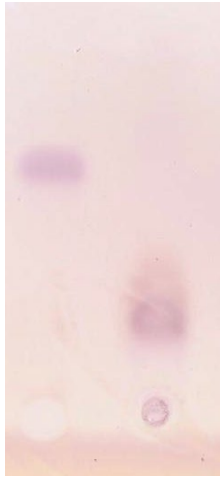

CDP-EtN  
EtN-P

Front  
CDP-EtN  
EtN-P  
Origin

**B**

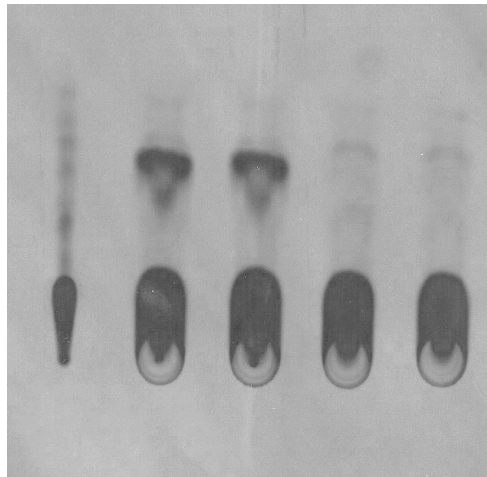

Buffer only

boiled  
Mouse liver lysate

CDP-EtN  
EtN-P  
Origin
