# Supplementary material for: Ethanolaminephosphate cytidylyltransferase is essential for survival, lipid homeostasis and stress tolerance in Leishmania major
Source: PubMed Central journal article supplement (PMC10411802; doi:10.1371/journal.ppat.1011112), 2023-07-28

Fig. S3

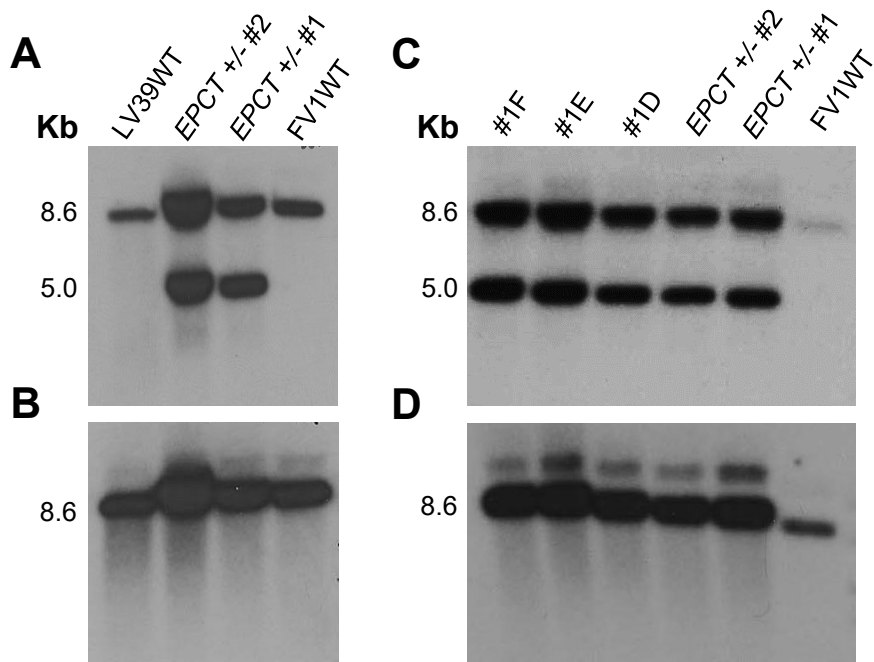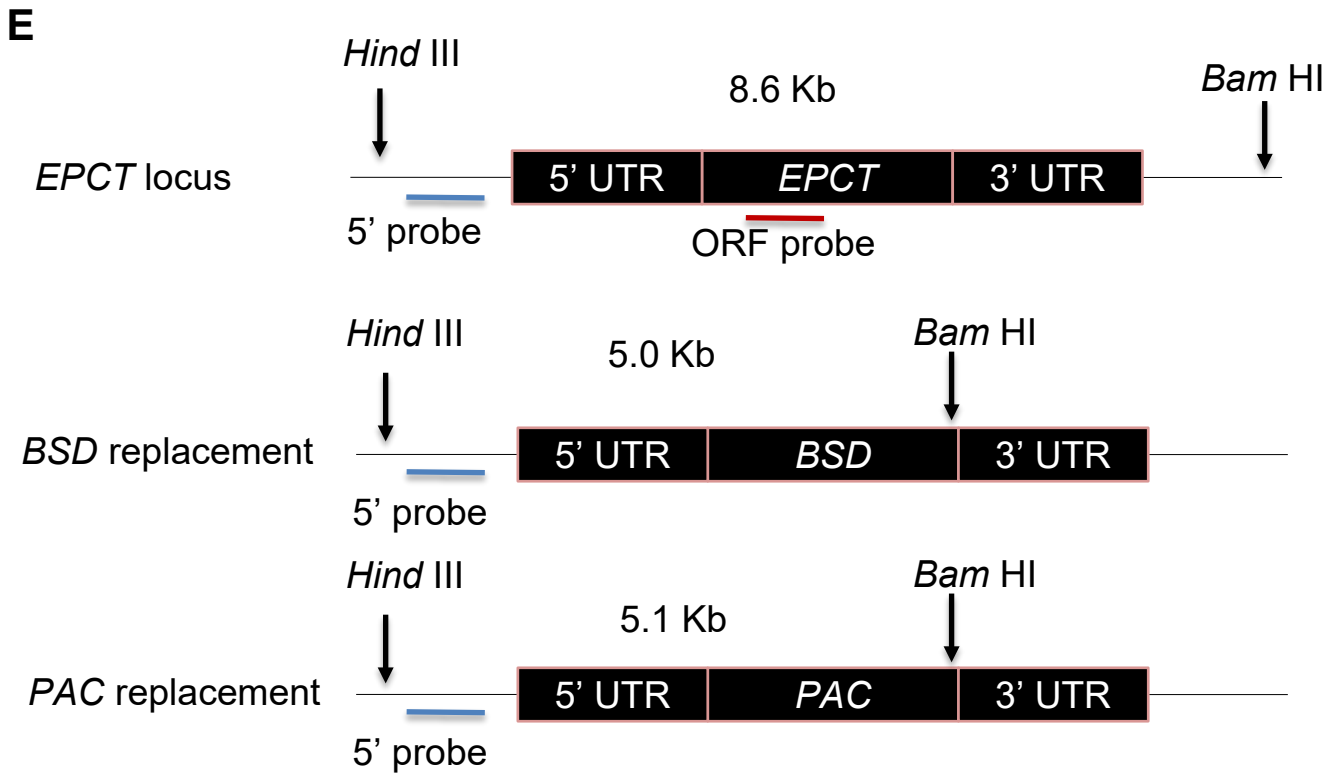

Supplement: ppat.1011112.s003.pdf [file ppat.1011112.s003.pdf]
