# Supplementary material for: Ethanolaminephosphate cytidylyltransferase is essential for survival, lipid homeostasis and stress tolerance in Leishmania major
Source: PubMed Central journal article supplement (PMC10411802; doi:10.1371/journal.ppat.1011112), 2023-07-28
Supplement: ppat.1011112.s014.pdf [file ppat.1011112.s014.pdf]

**Supplemental Table S1.**

| <b>Primer</b> | <b>Name</b>                  | <b>Sequence</b>                               |
|---------------|------------------------------|-----------------------------------------------|
| #52           | 5' UTR EPCT forward          | CATGACgaattcGACCAGCAACGTGAGGGAC               |
| #12           | 5' UTR EPCT reverse          | TCAGACACTAGTGATCATGGATCCGGTGGCGGCAGAAGTGG AAG |
| #13           | 3' UTR EPCT forward          | TCAGTAggatccCGTAGTGGGCTGGCGGGGAG              |
| #14           | 3' UTR EPCT reverse          | GATCATaagcttCAAATAAAGAGAGTCAGTG               |
| #9            | EPCT ORF forward             | GATCAGggatccACCATGCCCACCGTTTCTTCG             |
| #10           | EPCT ORF reverse             | GACTACggatccCTAGCTTGCCTCCCGTAATTTG            |
| #73           | EPCT 5' UTR Southern forward | AGCACTTGCTCCAAGCGAAGAG                        |
| #74           | EPCT 5' UTR Southern reverse | GAACAAGAAGCCGTACTTCACAG                       |
| #15           | EPCT ORF Southern forward    | GCCGAGGAGCGCTATGAGGC                          |
| #16           | EPCT ORF Southern reverse    | GAGAACTTGTCGCCTACAAC                          |
| #699          | 28S rRNA qPCR forward        | AAGATGGACCGGCCTCTAGT                          |
| #700          | 28S rRNA qPCR reverse        | ATCCTTCCCCGCTCCAGTAT                          |
| #703          | pXNG4 qPCR forward           | CCCGACAACCACTACCTGAG                          |
| #704          | pXNG4 qPCR reverse           | GTCCATGCCGAGAGTGATCC                          |
| #842          | EPCT ORF RT forward          | CATGAGCTTCAACGAGCGTG                          |
| #843          | EPCT ORF RT reverse          | GCCGTCAATCACATCCTTGC                          |
